# Supplementary material
Source: MDPI journal article supplement (https://www.mdpi.com/2073-4344/13/8/1182)
Supplement: s1 [file s1]

# The role of undecenoic acid on preparation of decorated MCM-41/polyethylene hybrids by in situ polymerization: catalytic aspects and properties of the resultant materials

María L. Cerrada <sup>1,\*</sup>, Artur Bento <sup>2</sup>, Ernesto Pérez <sup>1</sup>, João P. Lourenço <sup>2,3</sup> and M. Rosário Ribeiro <sup>2,\*</sup>

## Supporting Information

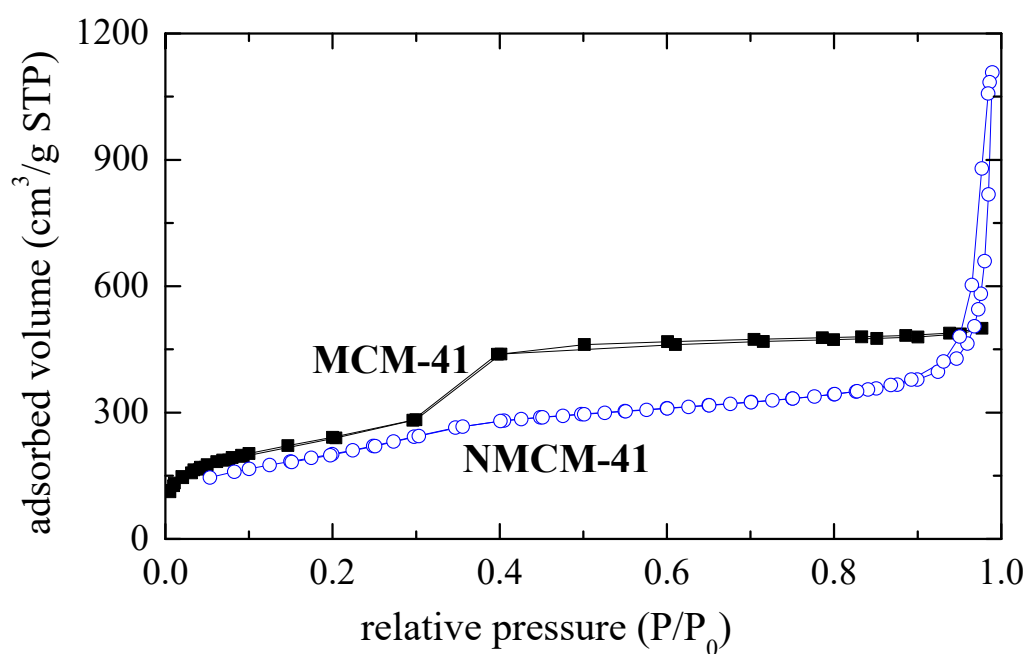

Figure S1. Nitrogen isotherms of NMCM-41 and MCM-41 (nano and microparticles, respectively; microparticles shown for comparison purpose).

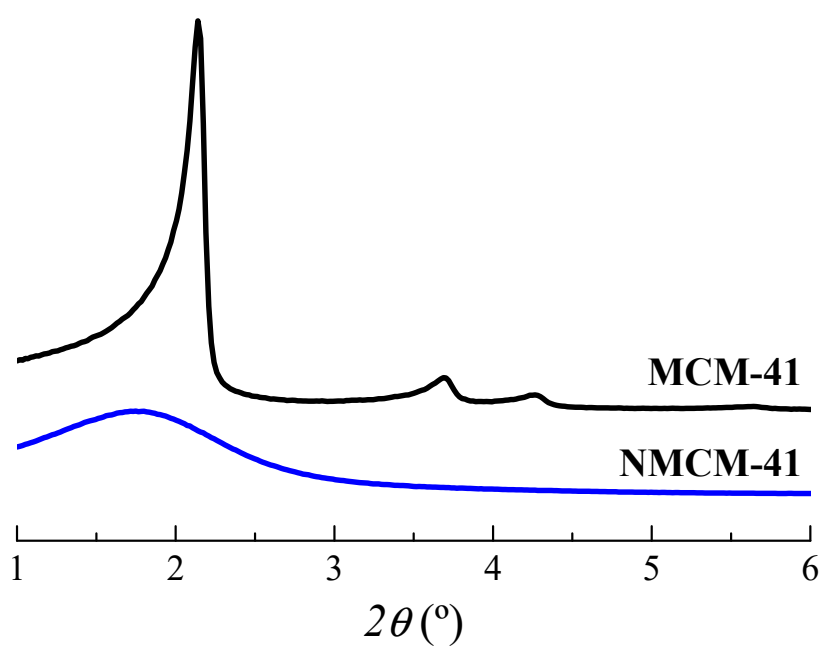

Figure S2. X-ray diffraction patterns for MCM-41 (black line) and NMCM-41 (blue line).

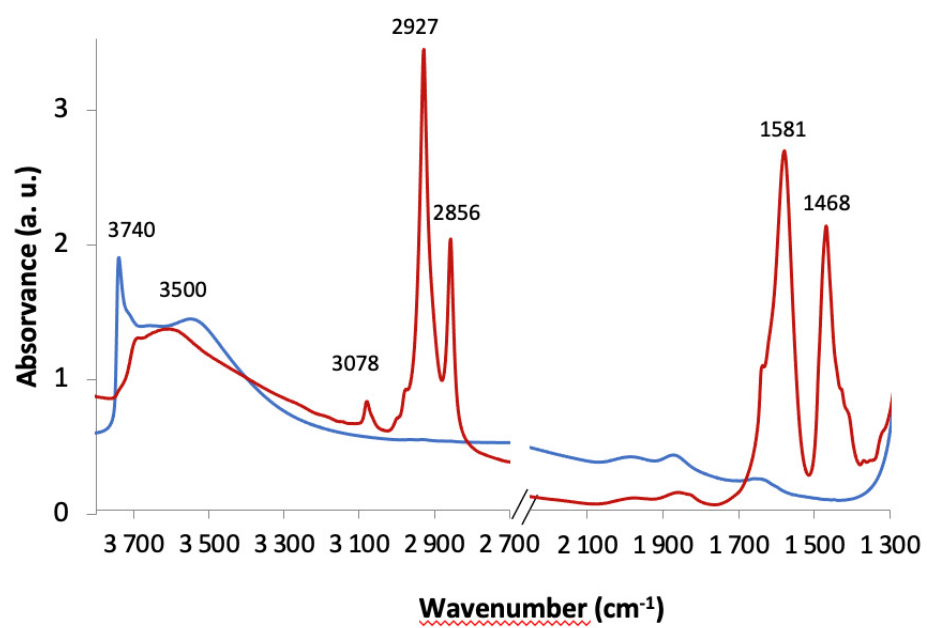

Figure S3. FTIR spectra for pristine (blue line) and modified (red line) NMCM-41.

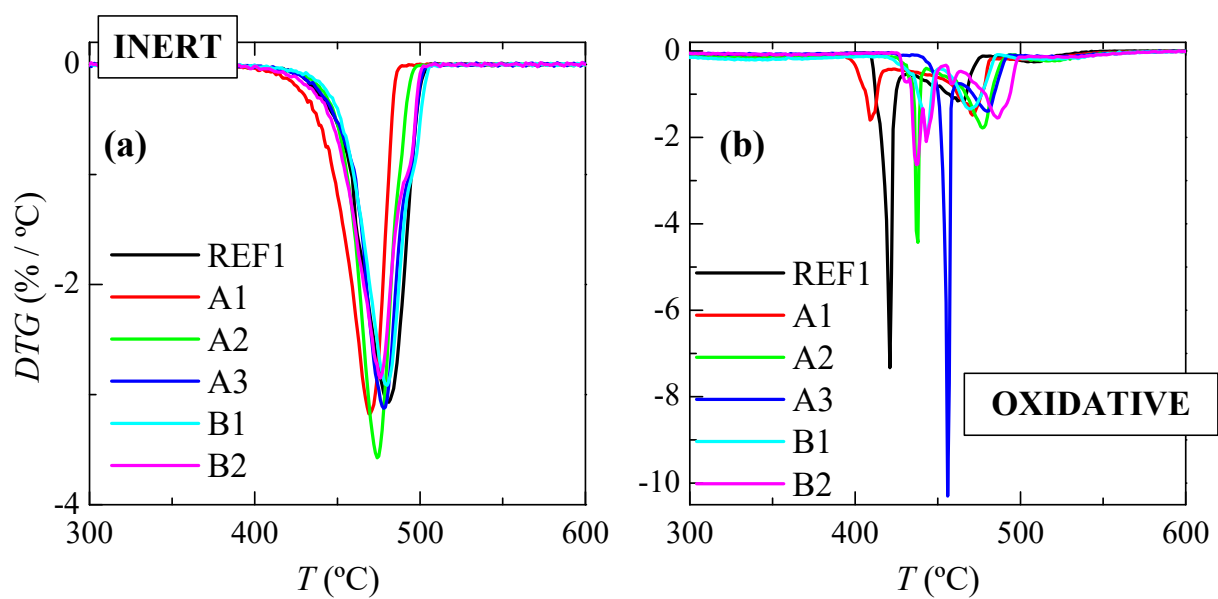

Figure S4. Derivatives of thermogravimetry (DTG) curves attained from experiments performed under (a) inert and (b) air atmospheres for the samples REF1 and the different nanocomposites synthesized by the two in- situ polymerization protocols.
